# Supplementary material for: Formation of graphene-encapsulated CoS2hybrid composites with hierarchical structures for high-performance lithium-ion batteries
Source: Royal Society of Chemistry journal article supplement (doi:10.1039/c7ra07068c), 2017-01-01
Supplement: c7ra07068c1.pdf [file c7ra07068c1.pdf]

## Supporting Information

### **Formation of Graphene-encapsulated CoS<sub>2</sub> Hybrid Composite with Hierarchical Structure for High-Performance Lithium-ion Batteries**

*Shi Tao*<sup>a,\*</sup>, *Weifeng Huang*<sup>c</sup>, *Hui Xie*<sup>b</sup>, *Jing Zhang*<sup>a</sup>, *Zhicheng Wang*<sup>a</sup>, *Wangsheng Chu*<sup>b</sup>, *Bin Qian*<sup>a,\*</sup>, *Li Song*<sup>b</sup>

<sup>a</sup> *Department of Physics and Electronic Engineering, Jiangsu Laboratory of Advanced Functional Materials, Changshu Institute of Technology, Changshu 215500, China*

<sup>b</sup> *National Synchrotron Radiation Laboratory, University of Science and Technology of China, Hefei, 230026, China*

<sup>c</sup> *College of Engineering, Peking University, Beijing 100871, China*

<sup>\*</sup> *Corresponding author. Tel: 0086+512 52251553. Fax: 0086+512 52251882.*

E-mail: [taoshi@cslg.edu.cn](mailto:taoshi@cslg.edu.cn)(S.Tao), [njqb@cslg.edu.cn](mailto:njqb@cslg.edu.cn)(B.Qian)

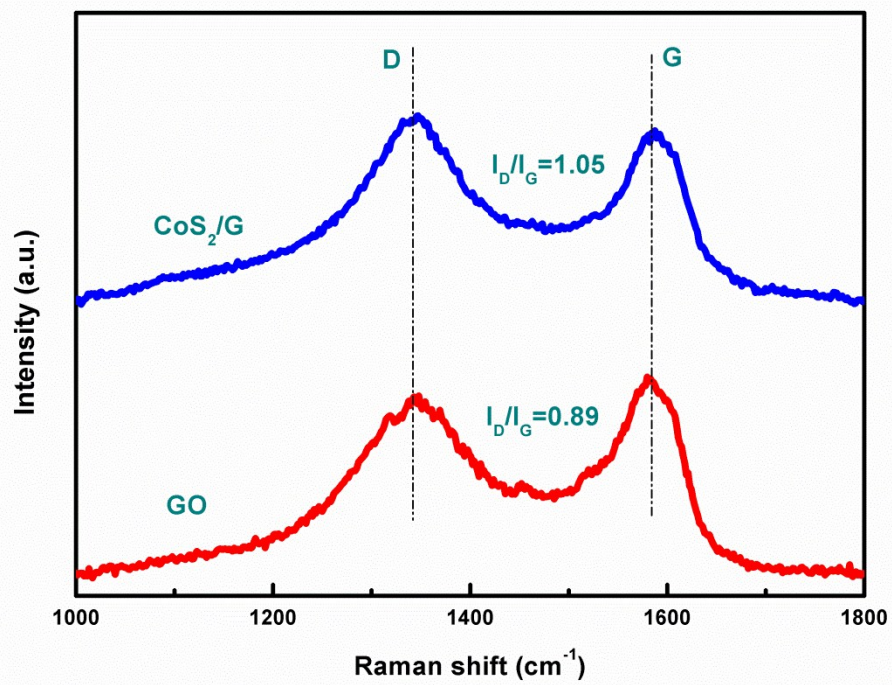

Figure S1. Raman spectrum of GO and  $\text{CoS}_2/\text{G}$ .

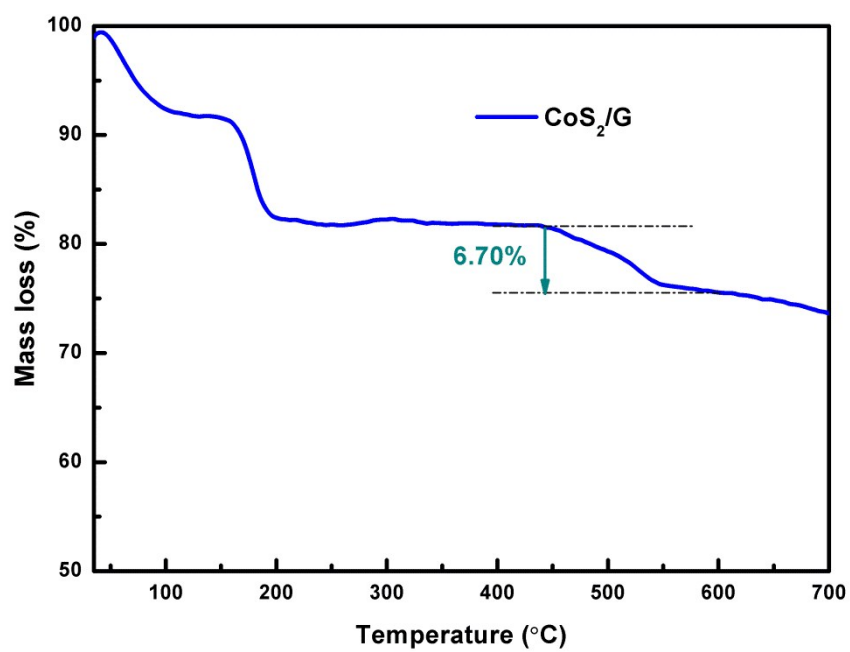

**Figure S1.** TGA curve of  $\text{CoS}_2/\text{G}$  sample.

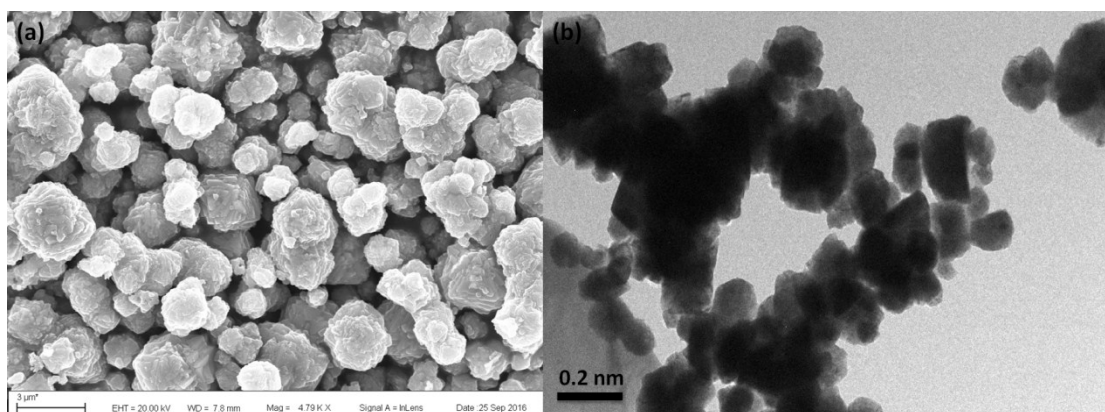

**Figure S3** (a) SEM image, and (b) TEM image of of bare CoS<sub>2</sub> sample.

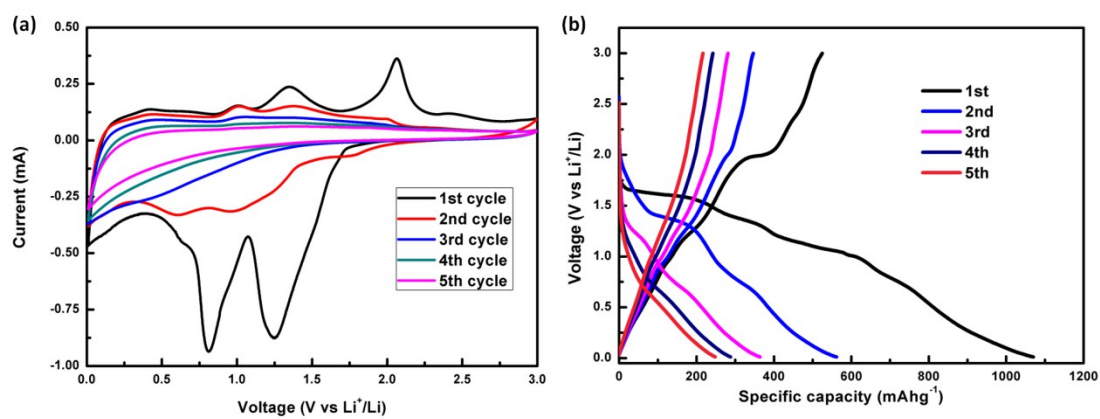

**Figure S4.** (a) CV curves, and (b) charge-discharge curves of bare CoS<sub>2</sub> sample.

**Table S1** Comparison of the electrochemical performance for CoS<sub>2</sub> based anodes in the previous literature with our sample

| Electrode materials                     | 1 <sup>st</sup> discharge/charge capacity (mAh g <sup>-1</sup> ) | Cycling performance                                                    | Ref       |
|-----------------------------------------|------------------------------------------------------------------|------------------------------------------------------------------------|-----------|
| CoS <sub>2</sub>                        | 1280/900                                                         | 350 mAh g <sup>-1</sup> at 50 mA g <sup>-1</sup> after 20 cycles       | 16        |
| CoS <sub>2</sub> /GNS                   | 1825/1018                                                        | 950 mAh g <sup>-1</sup> at 100 mA g <sup>-1</sup> after 50 cycles      | 17        |
| CoS <sub>2</sub> /graphene              | 1150/770                                                         | 360 mAh g <sup>-1</sup> at 800 mA g <sup>-1</sup> after 250 cycles     | 18        |
| CoS <sub>2</sub> polydedral             | 929.1/716.2                                                      | 702.4 mAh/g at 100 mA g <sup>-1</sup> after 10 cycles                  | 19        |
| CoS <sub>2</sub> /RGO                   | 1154/778                                                         | 644 mAh/g at 50 mA g <sup>-1</sup> after 30 cycles                     | 20        |
| CoS <sub>2</sub> spheres                | 1210/900                                                         | 320 mAh g <sup>-1</sup> at 50 mA/g after 40 cycles                     | 21        |
| CoS <sub>2</sub> @C                     | 1080/1060                                                        | 440 mAh g <sup>-1</sup> at 0.2 mA cm <sup>-2</sup> after 50 cycles     | 22        |
| CoS <sub>2</sub> -quantum dots/graphene | 1504/1185                                                        | 1129.6 mAh g <sup>-1</sup> at 100 mA g <sup>-1</sup> after 50 cycles   | 33        |
| CoS <sub>2</sub> nanocages/graphene     | 1169/893                                                         | 697 mAh g <sup>-1</sup> at 500 mA g <sup>-1</sup> after 300 cycles     | 34        |
| CoS <sub>2</sub> /fCNT                  | 1282.5/768.4                                                     | 337.8 mAh g <sup>-1</sup> at 1000 mA g <sup>-1</sup> after 1000 cycles | 23        |
| CoS <sub>2</sub> @C                     | 1082/788                                                         | 730 mAh g <sup>-1</sup> at 500 mA g <sup>-1</sup> after 200 cycles     | 24        |
| CoS <sub>2</sub> /N-doped C             | 1100/750                                                         | 560 mAh g <sup>-1</sup> at 100 mA g <sup>-1</sup> after 50 cycles      | 25        |
| CoS <sub>2</sub> /G                     | 1110/810                                                         | 400 mAh g <sup>-1</sup> at 500 mA g <sup>-1</sup> after 1000 cycles    | This work |
